# Supplementary material for: Stretching and compression of DNA by external forces under nanochannel confinement
Source: Royal Society of Chemistry journal article supplement (doi:10.1039/c7sm02413d), 2018-01-01
Supplement: c7sm02413d1.pdf [file c7sm02413d1.pdf]

## Supporting Information

### Stretching and compression of DNA by external forces under nanochannel confinement

Tomáš Bleha\*, Peter Cifra

*Polymer Institute, Slovak Academy of Sciences, 84541 Bratislava, Slovakia*

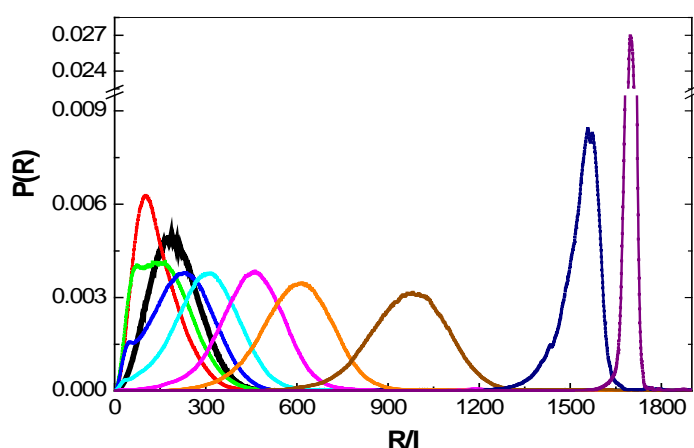

**Figure S1.** The distribution functions  $P(R)$  of DNA confined in channels of the reduced width  $D/P$  (from the right side): 0.68 (purple), 0.97 (navy), 1.54 (brown), 2.25 (orange), 2.96 (magenta), 4.39 (cyan), 5.82 (blue), 8.67 (green), 14.38 (red) and of bulk DNA (black, highlighted) plotted as a function of the end-to-end distance  $R$ .

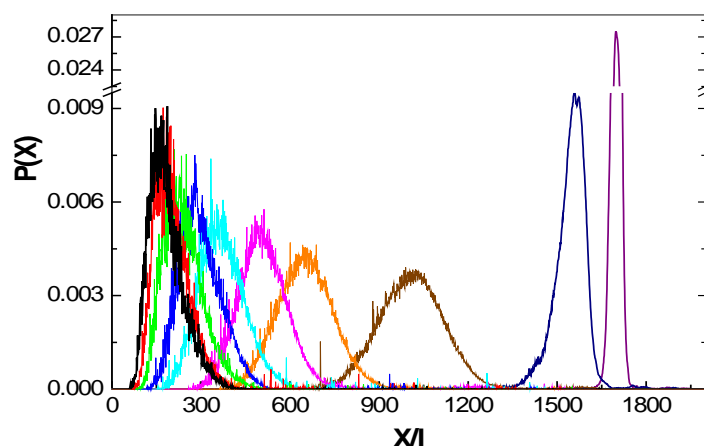

**Figure S2.** The distribution functions  $P(X)$  of DNA confined in channels of the reduced width  $D/P$  (from the right side): 0.68 (purple), 0.97 (navy), 1.54 (brown), 2.25 (orange), 2.96 (magenta), 4.39 (cyan), 5.82 (blue), 8.67 (green), 14.38 (red) and of bulk DNA (black, highlighted) plotted as a function of the chain span  $X$ .

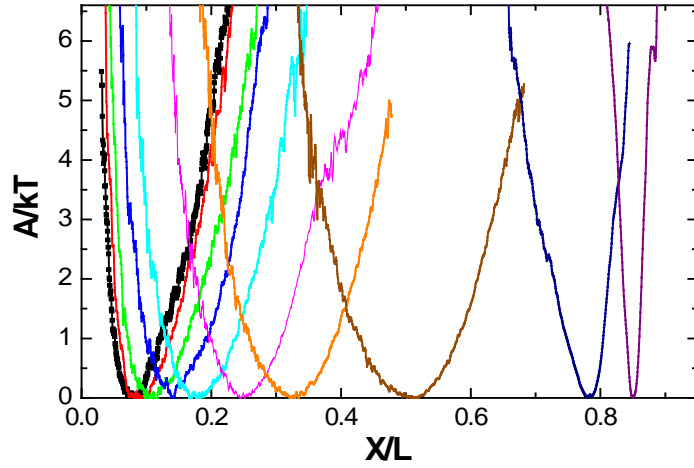

**Figure S3.** The free energy profiles  $A(X)$  of DNA molecules confined in the channels of the reduced width  $D/P$  (from the right side) : 0.68 (purple), 0.97 (navy) – the Odijk regime; 1.54 (brown), 2.25 (orange), 2.96 (magenta), 4.39 (cyan) – the T-zone; 5.82 (blue), 8.67 (green), 14.38 (red) – the de Gennes regime, and of bulk DNA (black, highlighted), plotted as a function of the fractional extension  $X/L$ .

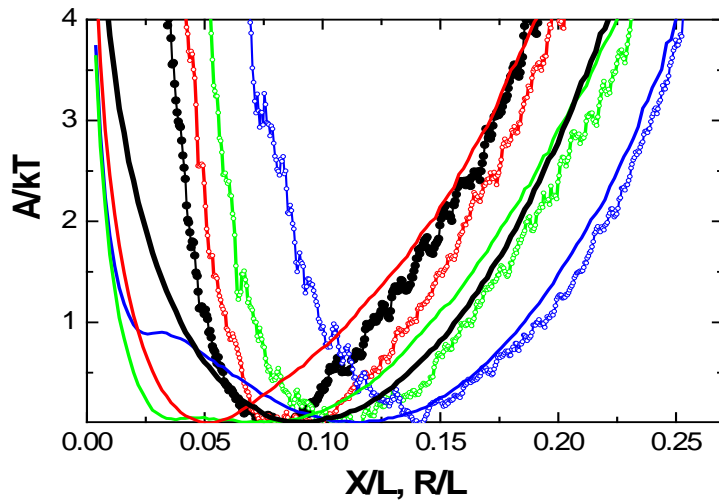

**Figure S4.** The free energy profiles  $A(R)$  and  $A(X)$  in the region of the fractional extension  $R/L$  and  $X/L$  less than 0.25 for DNA molecules in the channels of the reduced width  $D/P$ : 5.82 (blue), 8.67 (green), 14.38 (red) in the de Gennes regime, and for bulk DNA (black, highlighted).

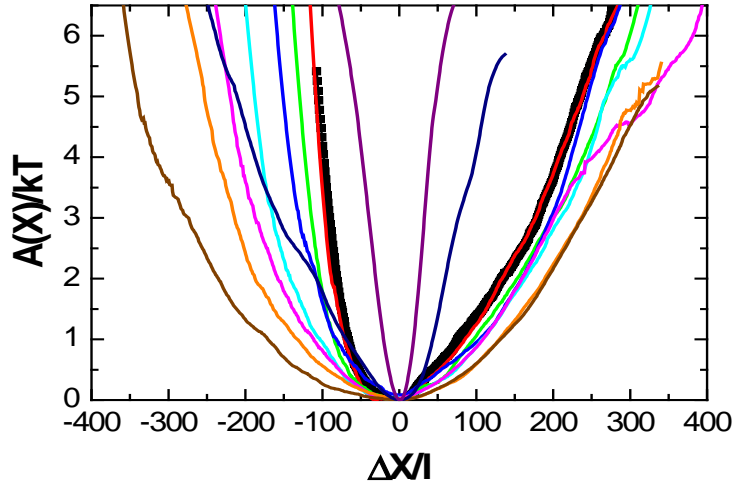

**Figure S5.** The elastic free energy profiles  $A(\Delta X)$  of confined DNA molecules and of the bulk DNA. The color code for the channels width  $D/P$ : 0.68 (purple), 0.97 (navy) – the Odijk regime; 1.54 (brown), 2.25 (orange), 2.96 (magenta), 4.39 (cyan) – the T-zone; 5.82 (blue), 8.67 (green), 14.38 (red) – the de Gennes regime, and for bulk DNA (black, highlighted).

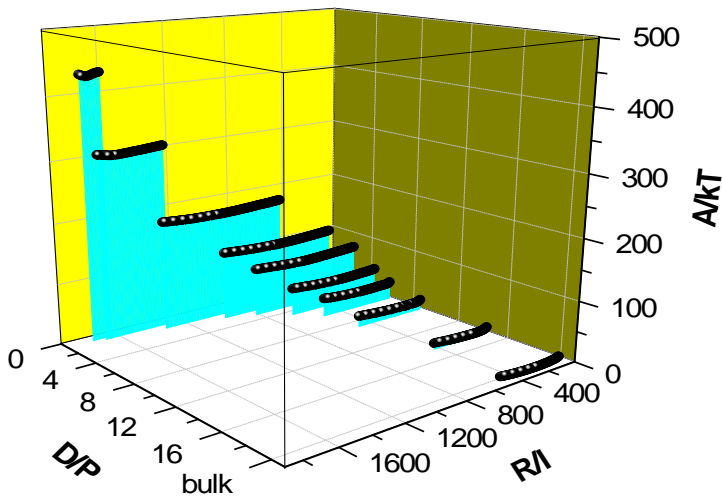

**Figure S6.** Visualization of the interplay of the confinement ( $A_D/kT$ ) and deformation ( $A(R)/kT$ ) free energy terms for DNA in channels and in bulk in the full ranges of the channel size  $D/P$  and the fractional extension  $R/L$ . The bulk data at the  $D/P$  axis are placed out of scale.
